# Supplementary material for: Phagocytosis of Aspergillus fumigatus by Human Bronchial Epithelial Cells Is Mediated by the Arp2/3 Complex and WIPF2
Source: Front Cell Infect Microbiol. 2019 Feb 7;9:16. doi: 10.3389/fcimb.2019.00016 (PMC6375057; doi:10.3389/fcimb.2019.00016)
Supplement: Supplementary Table 2 — A. fumigatus genes differentially expressed after co-incubation with AECs. Microarray data were accessed from the gene expression omnibus and analyzed for differential expression (FDR < 0.15). [file Data_Sheet_2.CSV]

	Field	Meta.Row	Meta.Column	Row	Column	Gene.ID	logFC	AveExpr	t	P.Value	adj.P.Val	B	Gene
13	A	1	3	10	19	3QAF00020_J_13	1.18930561979909	8.71397856077328	8.37678644925279	5.16141145992098e-06	0.0033828092149317	4.54275726989101	Afu2g09220
17	A	8	4	2	5	3QAF00012_E_8	-1.15086721158864	9.31483608022521	-8.27915860117541	5.75956824368898e-06	0.0033828092149317	4.43985222022428	Afu7g05470
31	A	5	4	3	3	3QAF00006_I_17	-1.05111163703134	9.97762670543189	-7.72664321883015	1.09167235663597e-05	0.00359624299931868	3.83504449582159	Obsolete
48	A	7	2	9	13	3QAF00006_G_7	1.76924059386412	12.9754301390742	7.31669560123629	1.79308829274606e-05	0.00366762428703836	3.36057401351598	Afu4g08580
53	A	4	3	5	18	3QAF00017_N_4	-1.07286721633708	10.3411728793156	-7.23774029855128	1.97733280140555e-05	0.00366762428703836	3.26657088887371	Afu6g08050
54	A	4	2	11	14	3QAF00009_G_4	-1.07685002691099	8.45938558317259	-7.21676206772252	2.02964493352248e-05	0.00366762428703836	3.24144943314757	Afu2g12870
57	A	6	2	7	20	3QAF00023_G_6	-1.06284884084893	9.95619057437733	-7.16489721424551	2.16548315034465e-05	0.00366762428703836	3.17907837061674	Afu8g01670
62	A	8	4	3	6	3QAF00013_A_8	0.946605000281711	9.46721228380225	7.15285148155103	2.19841255301762e-05	0.00366762428703836	3.16453882452706	Afu4g13410
66	A	2	4	6	17	3QAF00014_I_14	-0.909141239237487	9.60954675920093	-7.08126536034313	2.40556823513155e-05	0.00380043333147222	3.077712534607	Afu8g04340
77	A	4	1	9	1	3QAF00002_D_4	-1.02440711052016	11.5411963132405	-6.88087220699774	3.10555436831419e-05	0.00414930351085187	2.83079798980695	Afu6g12170
78	A	10	2	2	7	3QAF00015_G_22	-1.0171780118603	9.83996620421754	-6.87535320529362	3.1276955620627e-05	0.00414930351085187	2.82391652954845	Afu7g06770
80	A	7	4	1	7	3QAF00015_A_19	1.01045421993524	9.36869357352339	6.8353781364242	3.29322459487406e-05	0.00414930351085187	2.7739419213291	Afu4g08200
96	A	1	1	4	18	3QAF00017_L_1	-0.926732321391673	9.72421991207142	-6.70935635110069	3.87970116378843e-05	0.00418208962405816	2.61488125314495	Afu2g03120
119	A	4	2	11	15	3QAF00011_O_16	-0.935596218880631	8.78208535184059	-6.48469706785937	5.22237596432276e-05	0.00452504417850613	2.32554965670515	Afu5g02470
120	A	7	4	9	14	3QAF00008_M_19	-0.967521275659583	10.9722593011332	-6.47741734854881	5.27348679787116e-05	0.00452504417850613	2.3160493306051	Afu6g11260
121	A	8	1	9	17	3QAF00015_H_8	-1.04870924767109	9.39863549369828	-6.4744531551287	5.29445189195883e-05	0.00452504417850613	2.31217867681807	Afu4g11340
126	A	3	2	11	14	3QAF00009_G_3	-1.08190651789562	8.53215009706196	-6.42866087027409	5.62994766545073e-05	0.00464221032659181	2.25221637425566	Afu3g14270
130	A	9	4	11	1	3QAF00002_I_9	-1.04244099882274	10.7924474608617	-6.38107936680971	6.00284194296649e-05	0.00473191594810315	2.18957890418303	Afu2g03590
131	A	8	4	11	7	3QAF00016_I_20	-0.975424242668783	10.7843757610992	-6.3733550007533	6.065836520159e-05	0.00473191594810315	2.17937832636507	Afu6g03590
134	A	2	4	6	8	3QAF00018_M_14	-0.880447423727382	9.04250440435949	-6.36636508564563	6.12345258258186e-05	0.00473191594810315	2.17013992034242	Afu3g09290
136	A	4	1	4	3	3QAF00006_P_16	0.99229017003664	8.44258229431663	6.35677921577786	6.20342246298678e-05	0.00475610926629141	2.15745856380422	Afu1g13820
175	A	11	4	9	17	3QAF00015_E_11	-0.931787032032191	9.98382666654164	-6.07488209369044	9.13533766771427e-05	0.00545200731885824	1.77831630810255	Afu1g06110
201	A	5	4	3	11	3QAF00026_I_17	-0.783790455955302	9.28735658781792	-5.88093195441048	0.0001199754938591	0.00617342786386907	1.51041501582275	Afu1g05490
203	A	11	4	2	10	3QAF00023_M_23	1.04765579184213	9.11142561779824	5.87765439607256	0.000120534714385105	0.00617342786386907	1.50583804132684	Afu5g12710
208	A	1	2	11	17	3QAF00015_O_1	-0.892256133196032	9.14900756947612	-5.85550691197865	0.000124387316993922	0.00627119871433019	1.47486657285053	Afu6g00100
235	A	8	2	1	9	3QAF00021_C_8	1.6032197152583	7.83971324561935	5.69164021448212	0.000157323591895137	0.00698048124549187	1.24335764465901	Afu4g04120
244	A	5	4	10	21	3QAF00026_I_5	-0.791326486918865	9.42326162795362	-5.63729606889207	0.000170210526064747	0.00730364261430912	1.16566338397262	Afu6g10380
252	A	1	1	8	3	3QAF00007_P_1	-0.884254969509849	11.5420769168084	-5.58883974424728	0.000182652831758562	0.00758891183685645	1.09600096310424	Afu5g06360
259	A	4	4	5	6	3QAF00013_I_4	-0.700131720664953	9.73132736664129	-5.55655456698006	0.000191478827711651	0.00768908227265635	1.04938480327581	Afu1g12800
274	A	7	4	8	8	3QAF00019_E_7	-0.735795788387911	9.29490806923678	-5.48445323988348	0.000212873127440239	0.00813050586014421	0.944695751276706	Afu2g03950
278	A	1	2	6	14	3QAF00008_C_13	-0.816983155908826	8.02477836456904	-5.45479482728706	0.000222400320380579	0.008365922512264	0.901398982742165	Afu4g13550
290	A	12	2	3	1	3QAF00001_K_12	0.816441675283011	11.9675806257618	5.41700752080171	0.00023520146588162	0.00843740729036512	0.846038153991567	Afu2g03300
299	A	8	4	7	6	3QAF00013_A_20	-0.697011333424977	9.55151094128452	-5.37452354836969	0.000250536289039017	0.00873692938397936	0.783532888898177	Afu7g02580
317	A	3	3	9	9	3QAF00022_B_3	-0.821717063447816	11.0761290503629	-5.29783672946937	0.000280974676356318	0.00927127515939029	0.670001098828535	Afu2g09910
322	A	9	4	5	21	3QAF00025_E_21	-0.823697833640529	8.95431919692771	-5.26475254237582	0.00029529946166628	0.00950391357046755	0.620741679043491	Afu5g04330
364	A	2	2	9	14	3QAF00008_O_14	-0.783191349691068	8.71511948001448	-5.13157034200446	0.00036131159893047	0.0104360001164765	0.420747727712118	Afu7g00570
375	A	11	3	9	1	3QAF00002_B_11	1.19610887342849	8.67897448992559	5.09759457738114	0.000380548578047231	0.0107242703332391	0.369294371389656	Obsolete
378	A	7	2	3	11	3QAF00026_K_19	-0.748502996647487	9.68150175536327	-5.08886613994015	0.000385664071962918	0.0107810168320572	0.356047591888398	Afu8g05660
398	A	2	1	11	13	3QAF00006_P_2	-0.708412857227034	9.88878009973737	-5.03497267586264	0.000418909186280326	0.0110581419882151	0.274000132625965	Afu3g06970
419	A	6	1	11	2	3QAF00005_D_6	-0.72212606969396	9.25975987842175	-4.94491007232669	0.000481428766712082	0.0119517428876821	0.135911793490573	Afu8g04320
421	A	6	1	1	2	3QAF00003_L_18	0.891077010729776	12.1541214807561	4.94195181390864	0.000483642966006318	0.0119517428876821	0.131355426767181	Afu1g11220
423	A	6	2	5	3	3QAF00007_C_6	0.700546510642526	10.430910875152	4.93883096561279	0.000485990555223659	0.0119517428876821	0.126547219779957	Afu4g10440
425	A	3	4	10	8	3QAF00019_M_3	-0.659578796294326	9.23348766414514	-4.93729833388236	0.000487147859141164	0.0119517428876821	0.124185403104333	Afu6g13540
462	A	4	2	10	15	3QAF00011_K_16	-0.709442745271905	7.94195832926222	-4.81732136764214	0.000587451902833526	0.0133741506350331	-0.0617832000163725	Afu5g11370
467	A	9	1	3	7	3QAF00015_L_21	-0.786855119018953	9.20108531466691	-4.80614300365207	0.000597851379644059	0.0134639229709473	-0.0792181334240984	Afu3g05370
494	A	8	3	6	3	3QAF00007_F_8	-0.759939533317852	10.6774203497467	-4.74399151709354	0.000659333153208291	0.0139605571275595	-0.176488438575958	Afu5g13450
499	A	12	2	10	2	3QAF00004_O_24	0.680188948295452	11.0922186298361	4.74072087280078	0.000662748228458995	0.0139605571275595	-0.18162270162873	Afu5g06320
500	A	10	4	6	2	3QAF00004_M_10	-0.734909249737985	10.4120755629247	-4.73784928539728	0.000665762029200539	0.0139852861482355	-0.186131799586969	Afu1g03390
505	A	11	4	9	14	3QAF00008_M_23	-0.644454321200518	9.94234017977137	-4.7283032354834	0.00067588531999206	0.0140667789053038	-0.201130004885488	Afu1g11190
512	A	2	2	8	14	3QAF00008_K_14	-0.683517499635	8.10677513200782	-4.70691328867779	0.000699163545559444	0.0142621914545115	-0.23478434334375	Afu2g17870
521	A	10	4	3	17	3QAF00014_M_10	-0.71371078640413	10.5581446852767	-4.69845003904975	0.000708606311255206	0.0142637799371777	-0.248118339230209	Afu4g13120
523	A	7	2	6	1	3QAF00001_G_19	-0.640240888492078	10.8196583170539	-4.68126485548314	0.00072819714282574	0.0146079070205152	-0.275225467401332	Afu6g13250
528	A	7	2	5	19	3QAF00020_G_7	-0.686372210076268	9.85871961657361	-4.6716828656074	0.000739367950008583	0.0146500189922736	-0.290357990439833	Afu2g05650
544	A	4	1	4	12	3QAF00002_L_16	0.63516330854436	9.62184285715191	4.63374205569412	0.000785406864948175	0.0151096630642336	-0.350404899897952	Afu1g14150
555	A	1	2	5	13	3QAF00005_G_13	-0.79870186464518	8.69397133810408	-4.61102038981024	0.000814417640321641	0.0153163602527107	-0.386462778432418	Afu5g09530
591	A	4	1	3	11	3QAF00026_L_16	1.48150180520691	15.025739539346	4.5007889118953	0.000972094147228581	0.0173562083444391	-0.562415465412648	Afu6g13200
636	A	9	2	1	13	3QAF00005_G_9	-0.723802029096221	11.1865919350136	-4.39705600087993	0.00114999837906435	0.0191244547025582	-0.729509144860307	Afu1g10510
648	A	1	3	6	2	3QAF00004_N_1	-0.746580586580279	9.83289230202927	-4.37412564123133	0.00119375919603427	0.0193281477283375	-0.766638772519555	Afu2g09900
658	A	10	4	8	17	3QAF00015_A_10	-0.70505729605637	11.1631567012349	-4.35467421535339	0.00123225166303557	0.0195950626151804	-0.798189107167019	Afu2g15770
660	A	3	1	4	1	3QAF00001_P_3	0.788888184657486	11.6971094421498	4.3471787723615	0.00124743034674421	0.0197974980601246	-0.810359890056317	Afu6g03790
661	A	8	2	4	10	3QAF00024_G_8	-0.811569448595357	8.85918540191575	-4.34257550094761	0.00125684940991246	0.0199166699044943	-0.81783809234135	Afu4g06690
685	A	4	3	5	15	3QAF00011_F_4	-0.634847669851813	9.75574394894092	-4.29412482716116	0.00136063825283475	0.02076048964801	-0.896713249255246	Afu6g07520
687	A	2	3	3	10	3QAF00024_B_2	-1.01433819272464	8.73690449773749	-4.29250151234069	0.00136426756136857	0.02076048964801	-0.899361101485044	Afu6g02910
696	A	9	3	1	1	3QAF00001_B_9	0.726521508256056	11.619673639292	4.27838697799601	0.00139625518438609	0.0210386601265806	-0.922397900289941	Afu5g03300
702	A	2	4	10	17	3QAF00015_I_2	-0.603169835171436	9.94878611314372	-4.27012419262508	0.00141534514169502	0.0211234699454662	-0.935895503867482	Afu1g14850
704	A	7	1	10	4	3QAF00010_P_7	-0.635612608698505	10.4664803658189	-4.26981507931471	0.00141606459114615	0.0211234699454662	-0.936400619540668	Afu4g11730
705	A	2	4	4	5	3QAF00012_M_2	-0.590859619890041	9.99155801107054	-4.26656136893485	0.00142366077786234	0.0212064441868152	-0.941718166395034	Afu6g06500
720	A	11	2	8	14	3QAF00008_K_23	-0.655347135508735	11.7733354099327	-4.24453702681546	0.0014762155254492	0.0214012096689879	-0.97774733326359	Afu2g10030
738	A	1	2	5	2	3QAF00004_K_1	-0.673269516246856	10.9328569142458	-4.22110209026052	0.00153437463477533	0.0218863533745587	-1.01615002533477	Afu6g12660
761	A	5	4	10	2	3QAF00004_M_17	0.674107481485777	11.3041302956746	4.17962296955456	0.00164327360440376	0.0226346286302747	-1.08428603131559	Afu4g09360
771	A	4	2	4	8	3QAF00018_G_16	-0.748072594301886	8.90641084683333	-4.15362899403919	0.0017156160433549	0.0231719280881626	-1.12709071358374	Afu2g03580
776	A	1	1	11	20	3QAF00023_H_13	-0.635152480372501	9.54651653241113	-4.14734319241094	0.00173360504485641	0.0232670653965382	-1.13745368521372	Afu8g02850
783	A	4	1	8	12	3QAF00003_L_4	0.621626337452266	11.5390847671983	4.13724284622411	0.00176292505203803	0.0234630891251925	-1.15411518484528	Afu7g05290
785	A	11	3	2	19	3QAF00019_J_23	-0.612450134918464	10.0733049015419	-4.13309901891553	0.00177510365115279	0.0235184317288058	-1.16095429308586	Afu6g11430
788	A	11	1	5	7	3QAF00016_D_11	-0.679774617186363	9.54449151292805	-4.12435632398664	0.00180108769704377	0.0237420245475037	-1.17539010547616	Afu3g10750
795	A	12	1	8	5	3QAF00012_P_24	-0.648180367654433	9.63175442381043	-4.12026585255792	0.00181338119492511	0.0237806616019433	-1.18214729029076	Afu3g04170
803	A	5	1	4	1	3QAF00001_P_5	0.899131871813563	13.2309232972295	4.10316286969636	0.0018657403985489	0.0242267436309705	-1.21042125979088	Afu5g14210
808	A	2	2	11	14	3QAF00009_G_2	-0.657842416648239	8.45254576796432	-4.09744281907615	0.00188360241431496	0.0243374502776482	-1.21988493841849	Afu2g08860
817	A	11	2	4	17	3QAF00014_C_23	-0.597409126557939	9.60655314801887	-4.08334820547255	0.00192838249310245	0.0246412307053667	-1.24322008549529	Afu4g11350
818	A	4	4	5	13	3QAF00005_E_16	-0.622248519538911	10.2204691329319	-4.08257827111689	0.00193086046808872	0.0246426953497687	-1.24449544609287	Afu2g03040
834	A	7	1	6	12	3QAF00003_D_7	0.945753255311417	14.5061289863321	4.0602545573737	0.0020041729413549	0.0250569679370594	-1.28150276755234	Afu4g05900
837	A	3	3	6	3	3QAF00007_F_3	-0.636973289493201	9.30235172061697	-4.04579056952724	0.00205322043539426	0.0254868208093524	-1.30551038317038	Afu5g02150
838	A	9	2	5	7	3QAF00016_C_9	-0.598266511162129	9.02249678621893	-4.04352379600234	0.00206101993488413	0.0255271030519446	-1.30927492653923	Afu3g00340
842	A	5	3	10	7	3QAF00016_F_17	-0.906608555890094	8.0923080333892	-4.08673527249277	0.00235170501068188	0.02706537323	-1.326515223491	Afu6g08320
844	A	7	3	3	2	3QAF00004_B_7	0.61212175264348	11.1149822569633	4.0290286226593	0.00211163148856481	0.0260245234658775	-1.33336118882601	Afu8g01710
851	A	4	2	4	21	3QAF00025_C_16	-0.691116734747744	8.29708608266831	-4.01976112995549	0.00214466819871612	0.0261656720910872	-1.34877282797283	Afu7g01420
872	A	2	2	3	3	3QAF00006_K_14	-0.992520054024405	7.74698032674261	-3.99947473983385	0.00221888085614104	0.0265653667924236	-1.38254121164737	Afu3g08560
880	A	10	3	8	12	3QAF00003_J_10	0.587934731680373	11.3259350235136	3.99224766447987	0.00224596208295042	0.0266120984533227	-1.39458198376798	Afu3g06030
937	A	12	3	5	20	3QAF00022_N_24	-1.10560114041067	9.23871631782611	-3.91723365216928	0.00254827346449047	0.0281470841252565	-1.51988387365023	Afu5g11630
959	A	1	2	3	21	3QAF00025_O_1	-1.21114450316219	8.54419454236933	-3.88384946722996	0.00269615966066066	0.0289226921622517	-1.57583226781566	Afu2g15540
961	A	5	1	8	18	3QAF00017_L_17	-1.39644364608391	9.2611296545549	-3.8810233966	0.00270908185509499	0.0290016391202007	-1.5805735104981	Afu2g07680
975	A	11	1	11	14	3QAF00009_H_11	-0.591346060917663	9.59516934677145	-3.86376574414743	0.00278940247302406	0.0293996528345945	-1.60954314402158	Afu1g09930
986	A	5	2	2	3	3QAF00006_G_17	0.875540104846681	13.4903914000723	3.84494878266793	0.00287980761574862	0.0299724089007063	-1.64116284693063	Afu6g00690
987	A	11	1	9	2	3QAF00004_L_23	-0.608110187147851	9.2562142701131	-3.84485847736392	0.00288024875021652	0.0299724089007063	-1.64131467530994	Afu5g06060
1014	A	10	3	9	14	3QAF00008_N_22	1.40258372405712	8.2869774817594	3.80304791172025	0.00309222497942335	0.0311222295950264	-1.71169121501422	Afu4g09920
1034	A	2	2	2	3	3QAF00006_G_14	-0.785448650555462	7.80143493839078	-3.77014546518729	0.00327039331014137	0.03207834208884	-1.76718457756954	Afu4g07870
1054	A	4	3	9	1	3QAF00002_B_4	-0.602106905852627	9.18293939130482	-3.74792053570056	0.00339674099244238	0.0325295293060939	-1.80472267346147	Afu2g12950
1129	A	1	2	5	3	3QAF00007_C_1	-0.667438468386983	7.75074051032838	-3.63255554649654	0.00413880969027158	0.0370432348845165	-2.00022076765494	Afu7g02020
1163	A	7	2	7	7	3QAF00016_K_7	0.656746745270744	11.4919764794881	3.5742414583994	0.0045758449111332	0.0395296892198723	-2.09941544166994	Afu1g03040
1250	A	2	1	7	19	3QAF00020_P_2	-1.21897660983197	10.060138432688	-3.43469884267388	0.00582564097651969	0.0459485313632155	-2.33763214079276	Obsolete
1265	A	1	3	3	21	3QAF00025_N_1	-1.04440204064351	8.29231682065055	-3.40997713249617	0.00608132831701352	0.0471449891163569	-2.37994023424364	Afu2g10860
1268	A	12	3	10	13	3QAF00006_J_12	-0.615310144215847	9.13067661182728	-3.40614823339824	0.00612194751531752	0.0473263743653125	-2.38649531444505	Afu3g12270
1315	A	12	3	6	4	3QAF00009_N_24	0.610830428453832	13.0901753528713	3.35081443481963	0.00674103491814284	0.0502343642212322	-2.4812920490967	Afu1g05390
1319	A	11	1	10	12	3QAF00003_D_23	0.627825029954563	12.421711203374	3.34731278431927	0.00678230780392839	0.0502724624940003	-2.48729478582729	Afu1g13790
1323	A	3	2	2	4	3QAF00009_O_3	0.605380600143969	7.04792342878693	3.34264117033479	0.00683777399151124	0.0504225384791285	-2.49530378234855	Afu8g00330
1365	A	1	3	9	12	3QAF00003_N_1	0.655463771287674	13.2771280177497	3.27115689252964	0.00774684034887756	0.0547180715714743	-2.61793589254189	Afu3g05350
1399	A	11	2	2	12	3QAF00002_C_23	0.675501547452095	13.2382718268457	3.23148982395165	0.00830366179168717	0.05711232289045	-2.68603602652019	Obsolete
1401	A	5	1	2	7	3QAF00015_H_17	-0.656134266706033	10.2312144242294	-3.22843925915497	0.00834813945874698	0.0573209501972663	-2.69127430328939	Afu1g04160
1415	A	3	2	8	14	3QAF00008_K_15	0.755675111097084	13.9898192696058	3.21357563322056	0.00856835379547984	0.0582413461704487	-2.71679916393635	Afu3g05360
1538	A	3	1	1	21	3QAF00025_H_3	-0.767148482043234	10.3230014481191	-3.06345296368914	0.0111530105547779	0.068893626217221	-2.97464206815408	Afu3g02280
1580	A	1	2	3	5	3QAF00012_K_1	-0.925802557353709	7.12384500046484	-3.02808046765046	0.0118695381220441	0.0713325127112412	-3.03536589358766	Afu1g12930
1595	A	3	1	6	9	3QAF00021_H_15	-0.586213872129997	9.31800620294601	-3.01153146352857	0.012220584568042	0.0723589070363279	-3.06376585311978	Afu2g12530
1734	A	4	2	2	14	3QAF00008_C_4	-0.742962944925898	7.31876544082812	-2.82830206548919	0.0168825409509057	0.089176420716866	-3.37748988953982	Afu2g10370
1736	A	6	2	11	4	3QAF00010_C_18	-0.820362832997532	7.28282318273785	-2.82595375379597	0.0169526607387555	0.0894043901985211	-3.38149879767682	Afu5g03600
1740	A	6	1	10	4	3QAF00010_P_6	-0.623769600846886	8.89676272908701	-2.82152822154748	0.0170855992586629	0.0896449126819617	-3.38905278398608	Afu3g10920
